# Supplementary material for: Optimization of Bioreactor Cultivation Parameters by Taguchi Orthogonal Array Design for Enhanced Prodigiosin Production
Source: Preprints.org preprint supplement (doi:10.20944/preprints201707.0002.v1), 2017-07-03
Supplement: Supplementary file 1 [file supplementary]

S1: Absorption spectrum of red pigment with maximum absorbance at 535 nm produced by *Serratia* AM 8887


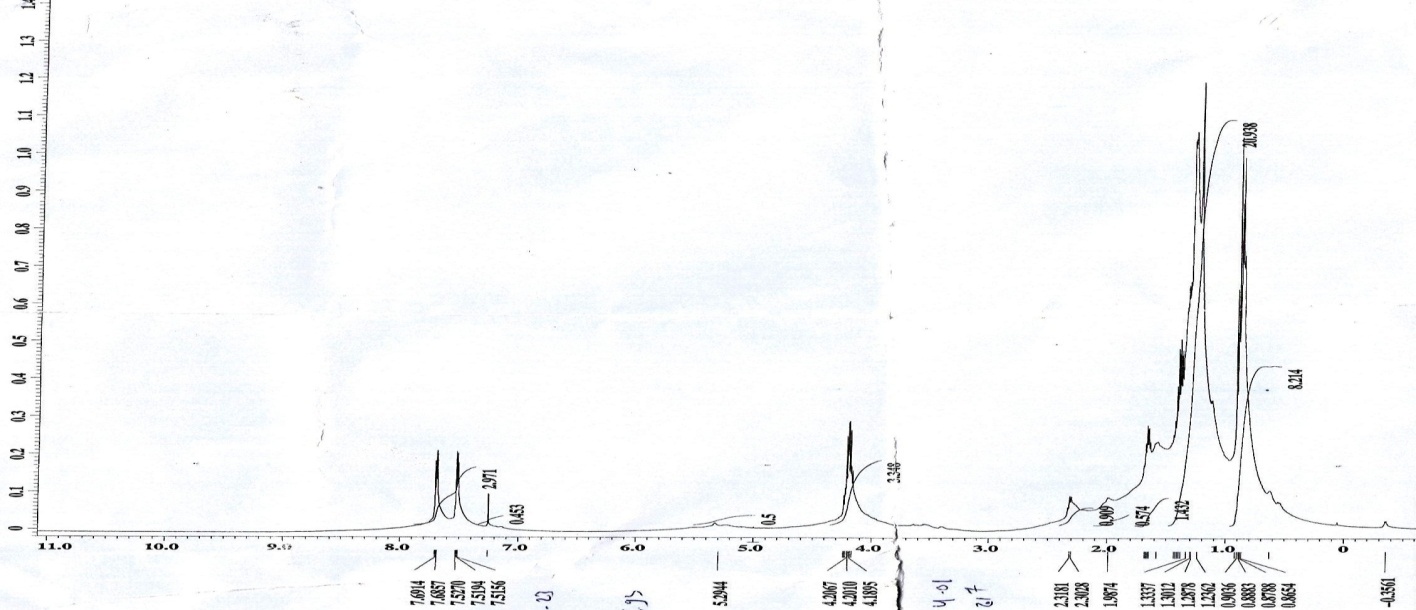


S2: NMR spectra (d,ppm) of prodigiosin


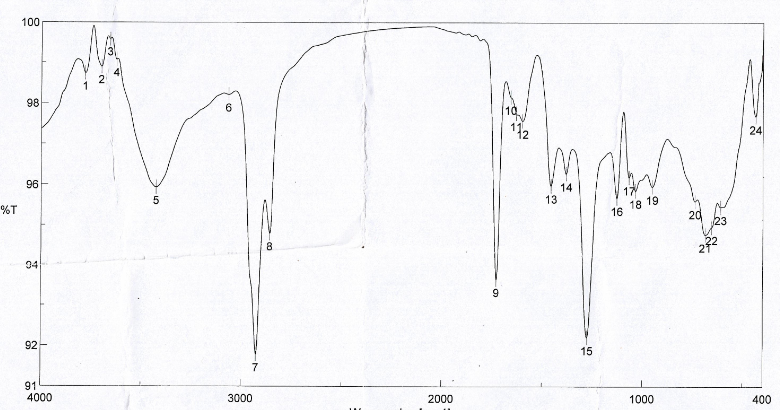


C=N
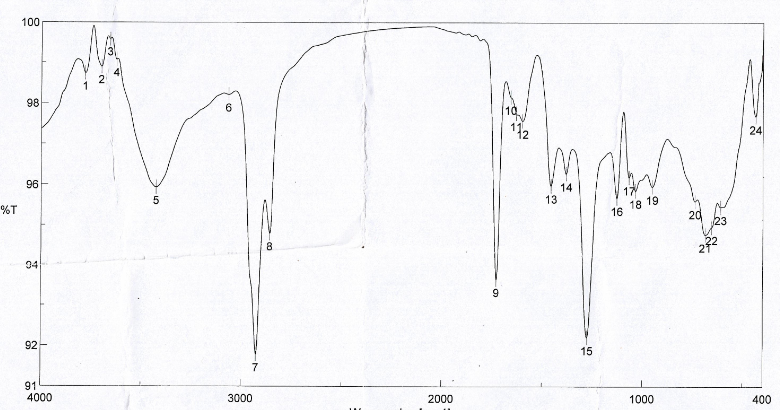


CH2

C-O-C

C=C

NH

S3: FTIR spectrum of the produced prodigiosin

S4: Mass spectrum of prodigiosin produced by *Serratia*

S5: Antimicrobial activity of produced prodigiosin against a number of clinical bacterial isolates

| **Bacterial strains** | **Diameter Of Inhibition Zones (Mm)** | | | |
| --- | --- | --- | --- | --- |
| **Pure pigment** | | **Crude pigment** | **Control** |
| ***Streptopyogenins*** | 26 | 28.6 | | -ve |
| ***MRSA*** | 24 | 25.33 | | -ve |
| ***p.aeruginosa*** | -ve | -ve | | -ve |
| ***Stah.epi*** | 35.33 | 22 | | -ve |
| ***Proteus vulgaris*** | -ve | -ve | | -ve |
| ***Klebsiella pneumonia*** | -ve | -ve | | -ve |
| ***Candida albicans*** | 24 | 23.33 | | -ve |
| ***E.Coli*** | -ve | -ve | | -ve |
| ***Stah.aureus*** | 30.66 | 19.33 | | -ve |
| ***Erwiniacarotovora*** | 21.66 | 16.66 | | -ve |
| ***Bacillus subtilis*** | 29.33 | 20.33 | | -ve |
| ***Enterobacter cloacae*** | -ve | -ve | | -ve |
